# Supplementary material
Source: PubMed Central journal article supplement (PMC6482930)
Supplement: JB.00028-19-s0001.pdf [file JB.00028-19-s0001.pdf]

**Table S1.** Genes selected and primer used for DRaCALA experiment

| <b>Gene product</b> | <b>Putative function</b>     | <b>Oligonucleotide Sequence</b>                                                             |
|---------------------|------------------------------|---------------------------------------------------------------------------------------------|
| <i>kupA</i>         | Potassium transporter        | (F) AAAGGATCCATGGGTTATGAATCTAATCGCTC<br>(R) TTTGTCGACTTATGATTCTCCTTGATTTTCTTCTG             |
| <i>kupB</i>         | Potassium transporter        | (F) AAAGGATCCCGTGGGTCAAGTACACTTACATAA<br>(R) TTTGTCGACTTAATGAGTTGCTGAAGCTTCT                |
| <i>lysP</i>         | Lysine specific permease     | (F) AAAGTCGACTTGAGTCTGAGTCAAACAAGTC<br>(R) TTTAAGCTTTTAATCTTTATGACGACTTAAATCAACC            |
| <i>lysQ</i>         | Lysine specific permease     | (F) AAAGGATCCATGGAAAATCAAAATCAGGTCAAG<br>(R) TTTAAGCTTTTATTTTTCCCGACTCAAATCTACT             |
| <i>yncB</i>         | Uncharacterized protein      | (F) AAAGGATCCATGAACTTATTA AAAACAAACTGGGA<br>(R) TTTAAGCTTTTATTTTTCATAATTTATCTAAAATCTCCATTTT |
| <i>oppA</i>         | Oligopeptide-binding protein | (F) TTTGGATCCATGAAAAAATTA AAAAGTAACTTTATTGGCA<br>(R) AAAAAGCTTCTATTTGGTTGCCATCTTATCAGA      |

---

|             |                           |                                                                     |
|-------------|---------------------------|---------------------------------------------------------------------|
| <i>yrbD</i> | voltage gated channel     | (F) TTT <u>GGATCC</u> ATGAAATTA <del>AAA</del> GATATAGAGAAATCAACAAA |
|             |                           | (R) AAAA <u>AAGCTT</u> TTTTATTTTTTCATTTAAACCTGACGAAG                |
| <i>yjdJ</i> | Potassium channel protein | (F) AAAG <u>GATCC</u> ATGTTTGAAAGTTTAATCGCTC                        |
|             |                           | (R) TTTA <u>AAGCTT</u> TCATTTATTTTTCTATTATTTTCCTTCTAAGG             |

(F) forward

(R) reverse

Underline restriction sites GGATCC (BamHI) and AAGCTT (HindIII)

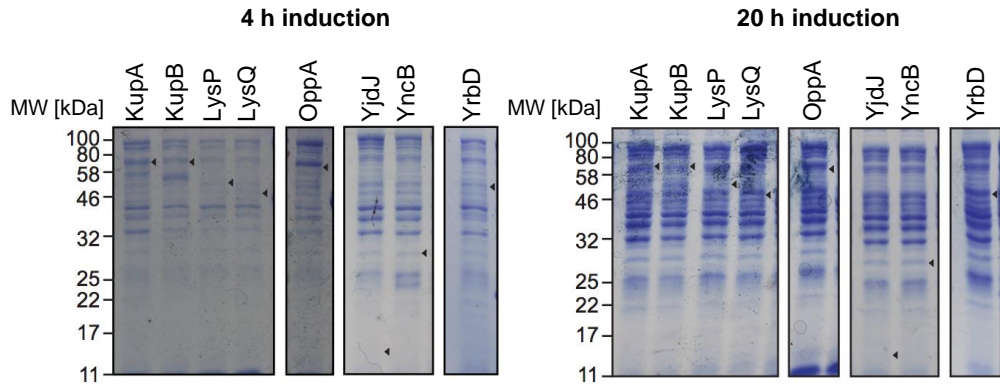

**Figure S1:** SDS PAGE of lysates from *E. coli* BL21 induced with 1 mM IPTG for either 4 or 20 hours. Black arrows point to positions corresponding to the indicated proteins' molecular weight (MW). IPTG-inducible expression was achieved by cloning the corresponding genes into the expression vector pWH844.

**A**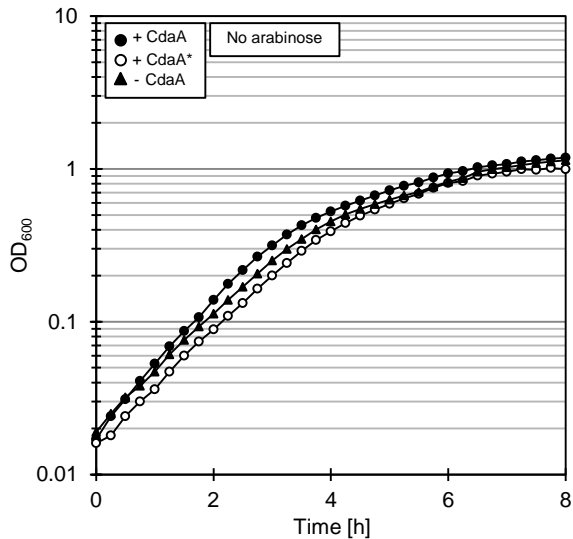**B**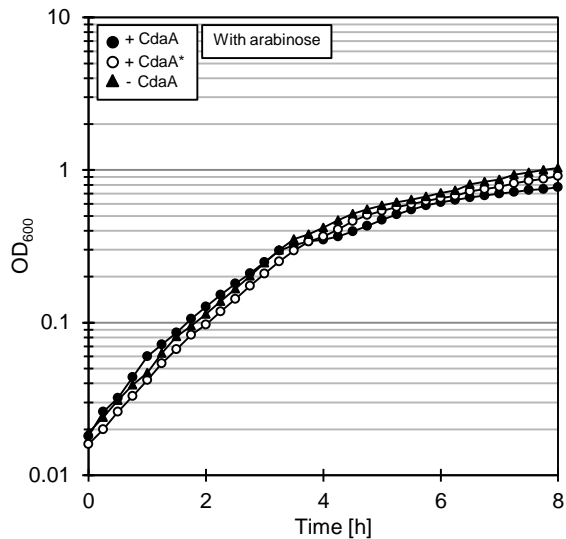

**Figure S2:** *E. coli* LB2003 carrying the relevant plasmids was cultivated in minimal salt M9mod media containing 50 mM KCl without arabinose (left) or with 0.005% L-arabinose (right) for induction of the *cdaA* alleles. A, B. The strain carried the plasmids pBP370 (CdaA), pBP373 (CdaA\*), or pBAD33 (empty vector control).
